# Supplementary material for: Demographic Processes Underlying Subtle Patterns of Population Structure in the Scalloped Hammerhead Shark, Sphyrna lewini
Source: PubMed Central journal article supplement (PMC3137562; doi:10.1371/journal.pone.0021459), 2011-07-14
Supplement: pone.0021459.s002.pdf [file pone.0021459.s002.pdf]

**Table S2. Diversity statistics for mtDNA per population.** Nucleotide ( $\pi$ ) and haplotype ( $h$ ) diversities, and neutrality statistics (Fu's  $F_s$  and Fu and Li's  $D^*$ ) are shown. Though neither neutrality statistic was significant at  $\alpha = 0.05$ , only samples TAR and SCA show an increase in new mutations with negative  $D^*$  values.

| <b>Sample</b> | <b>n,<br/>mtDNA</b> | <b><math>\pi</math></b> | <b><math>h</math></b> | <b><math>F_s</math></b> | <b><math>D^*</math></b> |
|---------------|---------------------|-------------------------|-----------------------|-------------------------|-------------------------|
| <b>LAP</b>    | 17                  | 0.0008                  | 0.4412                | 5.435                   | 0.677                   |
| <b>MAZ</b>    | 22                  | 0.0008                  | 0.4156                | 5.709                   | 0.064                   |
| <b>TAR</b>    | 20                  | 0.0013                  | 0.6158                | 4.087                   | -1.193                  |
| <b>SCA</b>    | 22                  | 0.0013                  | 0.5974                | 2.869                   | -1.729                  |
| <b>CEB</b>    | 18                  | 0.0012                  | 0.5686                | 4.196                   | -0.552                  |
| <b>GPA</b>    | 7                   | 0.0010                  | 0.5714                | 4.276                   | 0.953                   |
| <b>MAN</b>    | 20                  | 0.0010                  | 0.5263                | 6.643                   | 0.650                   |
