# Supplementary material for: Demographic Processes Underlying Subtle Patterns of Population Structure in the Scalloped Hammerhead Shark, Sphyrna lewini
Source: PubMed Central journal article supplement (PMC3137562; doi:10.1371/journal.pone.0021459), 2011-07-14
Supplement: pone.0021459.s003.pdf [file pone.0021459.s003.pdf]

**Table S3. Life history data used for generation time ( $G$ ) estimates.** Values of  $l_i$  (age-specific survival rates),  $b_i$  (birth rates), and  $p_i$  (probability of a gene being inherited from a parent of age  $i$ ), for all age classes,  $i$ , used to calculate the mean age of breeding adults,  $G$  [see 55].

| Age Class |       |       |       | Age Class |       |       |       |
|-----------|-------|-------|-------|-----------|-------|-------|-------|
| $i$       | $l_i$ | $b_i$ | $p_i$ | $i$       | $l_i$ | $b_i$ | $p_i$ |
| 1         | 1.000 | 0.0   | 0.0   | 18        | 0.071 | 14.0  | 0.091 |
| 2         | 0.682 | 0.0   | 0.0   | 19        | 0.064 | 12.0  | 0.071 |
| 3         | 0.514 | 0.0   | 0.0   | 20        | 0.059 | 15.0  | 0.081 |
| 4         | 0.409 | 0.0   | 0.0   | 21        | 0.054 | 12.0  | 0.059 |
| 5         | 0.337 | 0.0   | 0.0   | 22        | 0.049 | 13.0  | 0.059 |
| 6         | 0.284 | 0.0   | 0.0   | 23        | 0.045 | 14.5  | 0.060 |
| 7         | 0.244 | 0.0   | 0.0   | 24        | 0.041 | 15.0  | 0.057 |
| 8         | 0.212 | 0.0   | 0.0   | 25        | 0.038 | 13.0  | 0.045 |
| 9         | 0.185 | 0.0   | 0.0   | 26        | 0.035 | 15.0  | 0.048 |
| 10        | 0.164 | 0.0   | 0.0   | 27        | 0.032 | 13.0  | 0.038 |
| 11        | 0.145 | 0.0   | 0.0   | 28        | 0.029 | 12.0  | 0.032 |
| 12        | 0.130 | 0.0   | 0.0   | 29        | 0.027 | 12.0  | 0.030 |
| 13        | 0.116 | 0.0   | 0.0   | 30        | 0.025 | 11.0  | 0.025 |
| 14        | 0.105 | 4.0   | 0.038 | 31        | 0.023 | 12.0  | 0.025 |
| 15        | 0.095 | 5.0   | 0.043 | 32        | 0.021 | 12.0  | 0.023 |
| 16        | 0.086 | 8.5   | 0.067 | 33        | 0.020 | 12.0  | 0.021 |
| 17        | 0.078 | 12.0  | 0.086 |           |       |       |       |
