# Supplementary material for: Demographic Processes Underlying Subtle Patterns of Population Structure in the Scalloped Hammerhead Shark, Sphyrna lewini
Source: PubMed Central journal article supplement (PMC3137562; doi:10.1371/journal.pone.0021459), 2011-07-14
Supplement: pone.0021459.s004.pdf [file pone.0021459.s004.pdf]

**Table S4. Log-likelihood ratio test (LLRT) results from IMA analyses.** For each adjacent population pair, the likelihood of a simpler, alternative model where  $\theta_1 = \theta_2 = \theta_A$  is shown [ $\log(P)$ ], the degrees of freedom for the LLRT of the full and alternative model, results from the test (2LLR), and the probability of achieving the test statistic by chance under the null model ( $P$ -value) are shown. All alternative models where population size has not changed were rejected in favor of the full model at  $\alpha = 0.05$ .

| <b>Population Pair</b> | <b>Model</b>                             | <b><math>\log(P)</math></b> | <b>d.f.</b> | <b>2LLR</b> | <b><math>P</math> value</b> |
|------------------------|------------------------------------------|-----------------------------|-------------|-------------|-----------------------------|
| <b>LAP-MAZ</b>         | $\theta_1=\theta_2=\theta_A$ $m_1$ $m_2$ | -29.43                      | 2           | 40.94       | < 0.0001                    |
|                        | $\theta_1=\theta_2=\theta_A$ $m_1=m_2$   | -20.38                      | 3           | 22.84       | < 0.0001                    |
|                        | $\theta_1=\theta_2=\theta_A$ $m_1=m_2=0$ | -460.52                     | 4*          | 903.11      | < 0.0001                    |
| <b>LAP-TAR</b>         | $\theta_1=\theta_2=\theta_A$ $m_1$ $m_2$ | -460.52                     | 2           | 904.88      | < 0.0001                    |
|                        | $\theta_1=\theta_2=\theta_A$ $m_1=m_2$   | -460.52                     | 3           | 904.88      | < 0.0001                    |
|                        | $\theta_1=\theta_2=\theta_A$ $m_1=m_2=0$ | -460.52                     | 4*          | 904.88      | < 0.0001                    |
| <b>LAP-SCA</b>         | $\theta_1=\theta_2=\theta_A$ $m_1$ $m_2$ | -460.52                     | 2           | 908.00      | < 0.0001                    |
|                        | $\theta_1=\theta_2=\theta_A$ $m_1=m_2$   | -460.52                     | 3           | 908.00      | < 0.0001                    |
|                        | $\theta_1=\theta_2=\theta_A$ $m_1=m_2=0$ | -460.52                     | 4*          | 908.00      | < 0.0001                    |
| <b>LAP-MAN</b>         | $\theta_1=\theta_2=\theta_A$ $m_1$ $m_2$ | -460.52                     | 2           | 907.06      | < 0.0001                    |
|                        | $\theta_1=\theta_2=\theta_A$ $m_1=m_2$   | -460.52                     | 3           | 907.06      | < 0.0001                    |
|                        | $\theta_1=\theta_2=\theta_A$ $m_1=m_2=0$ | -460.52                     | 4*          | 907.06      | < 0.0001                    |
| <b>MAZ-TAR</b>         | $\theta_1=\theta_2=\theta_A$ $m_1$ $m_2$ | -460.52                     | 2           | 904.40      | < 0.0001                    |
|                        | $\theta_1=\theta_2=\theta_A$ $m_1=m_2$   | -460.52                     | 3           | 904.40      | < 0.0001                    |
|                        | $\theta_1=\theta_2=\theta_A$ $m_1=m_2=0$ | -460.52                     | 4*          | 904.40      | < 0.0001                    |
| <b>MAZ-SCA</b>         | $\theta_1=\theta_2=\theta_A$ $m_1$ $m_2$ | -460.52                     | 2           | 907.67      | < 0.0001                    |
|                        | $\theta_1=\theta_2=\theta_A$ $m_1=m_2$   | -460.52                     | 3           | 907.67      | < 0.0001                    |
|                        | $\theta_1=\theta_2=\theta_A$ $m_1=m_2=0$ | -460.52                     | 4*          | 907.67      | < 0.0001                    |
| <b>MAZ-CEB</b>         | $\theta_1=\theta_2=\theta_A$ $m_1$ $m_2$ | -460.52                     | 2           | 906.90      | < 0.0001                    |
|                        | $\theta_1=\theta_2=\theta_A$ $m_1=m_2$   | -460.52                     | 3           | 906.90      | < 0.0001                    |
|                        | $\theta_1=\theta_2=\theta_A$ $m_1=m_2=0$ | -460.52                     | 4*          | 906.90      | < 0.0001                    |

| Population Pair | Model                                    | log(P)  | d.f. | 2LLR   | P value  |
|-----------------|------------------------------------------|---------|------|--------|----------|
| <b>MAZ-MAN</b>  | $\theta_1=\theta_2=\theta_A$ $m_1$ $m_2$ | -460.52 | 2    | 907.76 | < 0.0001 |
|                 | $\theta_1=\theta_2=\theta_A$ $m_1=m_2$   | -460.52 | 3    | 907.76 | < 0.0001 |
|                 | $\theta_1=\theta_2=\theta_A$ $m_1=m_2=0$ | -460.52 | 4*   | 907.76 | < 0.0001 |
| <b>TAR-SCA</b>  | $\theta_1=\theta_2=\theta_A$ $m_1$ $m_2$ | -460.52 | 2    | 909.13 | < 0.0001 |
|                 | $\theta_1=\theta_2=\theta_A$ $m_1=m_2$   | -460.52 | 3    | 909.13 | < 0.0001 |
|                 | $\theta_1=\theta_2=\theta_A$ $m_1=m_2=0$ | -460.52 | 4*   | 909.13 | < 0.0001 |
| <b>TAR-CEB</b>  | $\theta_1=\theta_2=\theta_A$ $m_1$ $m_2$ | -65.15  | 2    | 114.86 | < 0.0001 |
|                 | $\theta_1=\theta_2=\theta_A$ $m_1=m_2$   | -69.59  | 3    | 123.74 | < 0.0001 |
|                 | $\theta_1=\theta_2=\theta_A$ $m_1=m_2=0$ | -460.52 | 4*   | 905.59 | < 0.0001 |
| <b>TAR-MAN</b>  | $\theta_1=\theta_2=\theta_A$ $m_1$ $m_2$ | -460.52 | 2    | 909.77 | < 0.0001 |
|                 | $\theta_1=\theta_2=\theta_A$ $m_1=m_2$   | -460.52 | 3    | 909.77 | < 0.0001 |
|                 | $\theta_1=\theta_2=\theta_A$ $m_1=m_2=0$ | -460.52 | 4*   | 909.77 | < 0.0001 |
| <b>SCA-CEB</b>  | $\theta_1=\theta_2=\theta_A$ $m_1$ $m_2$ | -460.52 | 2    | 905.55 | < 0.0001 |
|                 | $\theta_1=\theta_2=\theta_A$ $m_1=m_2$   | -460.52 | 3    | 905.55 | < 0.0001 |
|                 | $\theta_1=\theta_2=\theta_A$ $m_1=m_2=0$ | -460.52 | 4*   | 905.55 | < 0.0001 |
| <b>SCA-MAN</b>  | $\theta_1=\theta_2=\theta_A$ $m_1$ $m_2$ | -350.98 | 2    | 687.5  | < 0.0001 |
|                 | $\theta_1=\theta_2=\theta_A$ $m_1=m_2$   | -4.82   | 3    | 168.36 | < 0.0001 |
|                 | $\theta_1=\theta_2=\theta_A$ $m_1=m_2=0$ | -91.42  | 4*   | 906.58 | < 0.0001 |
| <b>CEB-MAN</b>  | $\theta_1=\theta_2=\theta_A$ $m_1$ $m_2$ | -460.52 | 2    | 904.11 | < 0.0001 |
|                 | $\theta_1=\theta_2=\theta_A$ $m_1=m_2$   | -460.52 | 3    | 904.11 | < 0.0001 |
|                 | $\theta_1=\theta_2=\theta_A$ $m_1=m_2=0$ | -460.52 | 4*   | 904.11 | < 0.0001 |

\* Test distribution of 2LLR is a mixture
