# Supplementary material for: Demographic Processes Underlying Subtle Patterns of Population Structure in the Scalloped Hammerhead Shark, Sphyrna lewini
Source: PLoS One. 2011 Jul 14;6(7):e21459. doi: 10.1371/journal.pone.0021459 (PMC3137562; doi:10.1371/journal.pone.0021459)
Supplement: Table S1 — Microsatellite statistics per locus, per population. A = total number of alleles per locus across all populations. AE = effective number of alleles. Ap = private alleles per locus, per population. Ho = observed heterozygosity per locus, per population, and He = expected heterozygosity per locus, per population, as calculated in Arlequin v. 3.11 [32]. P-values in bold were significant after sequential Bonferroni correction of alpha (α). Number next to population abbreviation indicates number of samples. (PDF) [file pone.0021459.s001.pdf]

**Table S1. Microsatellite statistics per locus, per population.**  $A$  = total number of alleles per locus across all populations.  $A_E$  = effective number of alleles.  $Ap$  = private alleles per locus, per population.  $H_o$  = observed heterozygosity per locus, per population, and  $H_e$  = expected heterozygosity per locus, per population, as calculated in Arlequin v. 3.11 [32]. P-values in bold were significant after sequential Bonferroni correction of alpha ( $\alpha$ ). Number next to population abbreviation indicates number of samples.

| LAP = 24 |    |       |      |       |       |              | MAZ = 38 |        |      |       |       |              | TAR = 40 |        |      |       |       |              | SCA = 46 |        |      |       |       |              |
|----------|----|-------|------|-------|-------|--------------|----------|--------|------|-------|-------|--------------|----------|--------|------|-------|-------|--------------|----------|--------|------|-------|-------|--------------|
| Locus    | A  | $A_E$ | $Ap$ | $H_o$ | $H_e$ | <i>p-val</i> | A        | $A_E$  | $Ap$ | $H_o$ | $H_e$ | <i>p-val</i> | A        | $A_E$  | $Ap$ | $H_o$ | $H_e$ | <i>p-val</i> | A        | $A_E$  | $Ap$ | $H_o$ | $H_e$ | <i>p-val</i> |
| Cli12    | 18 | 9.796 | 0    | 0.870 | 0.918 | 0.177        | 17       | 11.571 | 0    | 1.000 | 0.946 | 0.877        | 24       | 14.327 | 1    | 0.923 | 0.943 | 0.619        | 18       | 12.783 | 2    | 0.871 | 0.940 | 0.071        |
| Cli100   | 9  | 4.82  | 0    | 0.792 | 0.809 | 0.619        | 8        | 5.684  | 0    | 0.868 | 0.834 | 0.724        | 9        | 6.317  | 0    | 0.825 | 0.811 | 0.465        | 9        | 4.477  | 2    | 0.767 | 0.806 | 0.230        |
| SLE013   | 9  | 3.756 | 2    | 0.700 | 0.753 | 0.544        | 4        | 2.125  | 2    | 0.737 | 0.631 | 0.529        | 7        | 2.760  | 2    | 0.650 | 0.742 | 0.079        | 5        | 2.609  | 1    | 0.611 | 0.662 | 0.468        |
| SLE025   | 13 | 7.121 | 0    | 0.778 | 0.884 | 0.108        | 14       | 6.644  | 3    | 0.946 | 0.891 | 0.788        | 19       | 6.099  | 0    | 0.825 | 0.881 | 0.155        | 13       | 6.811  | 6    | 0.841 | 0.875 | 0.388        |
| SLE027   | 10 | 5.348 | 0    | 0.696 | 0.754 | 0.484        | 8        | 5.838  | 0    | 0.639 | 0.649 | 0.694        | 13       | 5.882  | 0    | 0.700 | 0.737 | 0.015        | 11       | 5.547  | 2    | 0.539 | 0.594 | 0.041        |
| SLE028   | 6  | 3.615 | 0    | 0.909 | 0.832 | 0.223        | 7        | 3.803  | 1    | 0.694 | 0.838 | 0.202        | 9        | 4.071  | 1    | 0.950 | 0.834 | 0.031        | 8        | 3.767  | 1    | 0.852 | 0.842 | 0.264        |
| SLE033   | 7  | 5.97  | 0    | 0.762 | 0.741 | 0.047        | 6        | 3.657  | 0    | 0.778 | 0.786 | 0.067        | 6        | 3.860  | 1    | 0.795 | 0.821 | 0.343        | 8        | 5.250  | 3    | 0.779 | 0.801 | 0.010        |
| SLE038   | 8  | 3.806 | 0    | 0.800 | 0.854 | 0.616        | 5        | 2.359  | 1    | 0.667 | 0.746 | 0.799        | 10       | 2.807  | 0    | 0.700 | 0.800 | 0.399        | 8        | 2.800  | 1    | 0.764 | 0.823 | 0.022        |
| SLE045   | 4  | 2.964 | 0    | 0.565 | 0.677 | 0.242        | 5        | 3.322  | 0    | 0.583 | 0.699 | 0.107        | 5        | 3.805  | 0    | 0.564 | 0.670 | 0.025        | 5        | 3.052  | 2    | 0.583 | 0.671 | 0.024        |
| SLE053   | 8  | 3.216 | 0    | 0.435 | 0.704 | 0.006        | 7        | 3.482  | 0    | 0.639 | 0.790 | <b>0.001</b> | 9        | 5.959  | 0    | 0.725 | 0.832 | 0.320        | 11       | 6.452  | 1    | 0.727 | 0.872 | <b>0.000</b> |
| SLE071   | 10 | 3.396 | 0    | 0.773 | 0.722 | 0.191        | 8        | 3.746  | 0    | 0.737 | 0.747 | 0.024        | 10       | 3.910  | 0    | 0.675 | 0.708 | 0.716        | 8        | 4.402  | 0    | 0.554 | 0.673 | <b>0.002</b> |
| SLE077   | 18 | 9.68  | 0    | 0.864 | 0.918 | 0.623        | 14       | 7.364  | 2    | 0.895 | 0.882 | 0.367        | 20       | 8.545  | 3    | 0.947 | 0.917 | 0.811        | 15       | 8.699  | 4    | 0.820 | 0.868 | 0.138        |
| SLE081   | 8  | 4.889 | 0    | 0.818 | 0.814 | 0.174        | 9        | 5.268  | 0    | 0.865 | 0.831 | 0.519        | 9        | 4.681  | 0    | 0.800 | 0.818 | 0.967        | 9        | 4.945  | 0    | 0.875 | 0.805 | 0.842        |
| SLE086   | 5  | 3.639 | 0    | 0.773 | 0.742 | 0.499        | 5        | 3.620  | 0    | 0.730 | 0.732 | 0.683        | 5        | 2.623  | 1    | 0.795 | 0.680 | 0.028        | 6        | 4.272  | 0    | 0.631 | 0.749 | <b>0.000</b> |
| SLE089   | 10 | 4.939 | 0    | 0.773 | 0.816 | 0.609        | 8        | 5.492  | 0    | 0.868 | 0.829 | 0.303        | 10       | 5.471  | 0    | 0.900 | 0.842 | 0.269        | 10       | 7.220  | 0    | 0.822 | 0.844 | 0.137        |
| CEB = 21 |    |       |      |       |       |              | GPA = 9  |        |      |       |       |              | MAN = 43 |        |      |       |       |              |          |        |      |       |       |              |
| Locus    | A  | $A_E$ | $Ap$ | $H_o$ | $H_e$ | <i>p-val</i> | A        | $A_E$  | $Ap$ | $H_o$ | $H_e$ | <i>p-val</i> | A        | $A_E$  | $Ap$ | $H_o$ | $H_e$ | <i>p-val</i> |          |        |      |       |       |              |
| Cli12    | 30 | 15.15 | 0    | 0.810 | 0.944 | 0.044        | 12       | 10.125 | 0    | 0.667 | 0.954 | <b>0.000</b> | 30       | 14.948 | 1    | 0.940 | 0.249 | <b>0.000</b> |          |        |      |       |       |              |
| Cli100   | 10 | 5.045 | 0    | 0.619 | 0.796 | 0.067        | 7        | 4.263  | 0    | 0.778 | 0.810 | 0.980        | 10       | 5.796  | 0    | 0.853 | 0.833 | 0.075        |          |        |      |       |       |              |
| SLE013   | 11 | 2.927 | 0    | 0.714 | 0.632 | 0.642        | 5        | 3.306  | 0    | 0.556 | 0.739 | 0.775        | 15       | 2.781  | 5    | 0.583 | 0.645 | 0.045        |          |        |      |       |       |              |
| SLE025   | 30 | 7.702 | 1    | 0.895 | 0.876 | 0.985        | 10       | 7.043  | 0    | 1.000 | 0.909 | 0.775        | 24       | 7.348  | 3    | 0.813 | 0.870 | 0.494        |          |        |      |       |       |              |
| SLE027   | 21 | 6.109 | 0    | 0.619 | 0.659 | 0.016        | 7        | 4.909  | 1    | 0.750 | 0.767 | 0.845        | 15       | 5.113  | 1    | 0.671 | 0.658 | 0.694        |          |        |      |       |       |              |
| SLE028   | 11 | 4.903 | 0    | 0.857 | 0.840 | 0.854        | 6        | 3.600  | 0    | 0.889 | 0.843 | 0.916        | 14       | 4.118  | 0    | 0.824 | 0.810 | 0.718        |          |        |      |       |       |              |
| SLE033   | 12 | 5.493 | 0    | 0.667 | 0.756 | 0.400        | 6        | 5.586  | 0    | 0.889 | 0.765 | 0.832        | 9        | 4.524  | 0    | 0.735 | 0.763 | 0.343        |          |        |      |       |       |              |
| SLE038   | 10 | 2.438 | 0    | 0.762 | 0.829 | 0.921        | 6        | 3.556  | 0    | 1.000 | 0.869 | 0.764        | 11       | 2.881  | 1    | 0.770 | 0.784 | 0.048        |          |        |      |       |       |              |
| SLE045   | 7  | 2.999 | 0    | 0.762 | 0.689 | 0.735        | 5        | 3.447  | 0    | 0.444 | 0.752 | 0.127        | 5        | 3.211  | 0    | 0.662 | 0.693 | 0.199        |          |        |      |       |       |              |
| SLE053   | 16 | 7.481 | 0    | 0.800 | 0.867 | 0.725        | 10       | 8.100  | 0    | 0.889 | 0.928 | 0.718        | 16       | 8.451  | 1    | 0.803 | 0.888 | 0.530        |          |        |      |       |       |              |
| SLE071   | 9  | 3.026 | 0    | 0.789 | 0.794 | 0.740        | 6        | 2.700  | 0    | 0.667 | 0.667 | 0.677        | 13       | 3.379  | 2    | 0.675 | 0.709 | 0.390        |          |        |      |       |       |              |
| SLE077   | 26 | 7.321 | 0    | 0.895 | 0.909 | 0.538        | 10       | 6.750  | 0    | 0.889 | 0.902 | 0.864        | 26       | 8.823  | 5    | 0.909 | 0.892 | 0.176        |          |        |      |       |       |              |
| SLE081   | 10 | 5.022 | 1    | 0.947 | 0.819 | 0.567        | 6        | 4.765  | 0    | 0.667 | 0.837 | 0.722        | 9        | 5.196  | 1    | 0.800 | 0.813 | 0.515        |          |        |      |       |       |              |
| SLE086   | 7  | 3.915 | 0    | 0.947 | 0.787 | 0.550        | 4        | 3.176  | 0    | 0.667 | 0.725 | 0.088        | 6        | 4.064  | 0    | 0.707 | 0.759 | 0.032        |          |        |      |       |       |              |
| SLE089   | 11 | 6.238 | 1    | 0.895 | 0.885 | 0.758        | 8        | 5.063  | 0    | 0.778 | 0.850 | 0.845        | 12       | 6.021  | 0    | 0.808 | 0.839 | 0.508        |          |        |      |       |       |              |
